# Supplementary material
Source: PubMed Central journal article supplement (PMC9552043)
Supplement: jama-e2218931-s002.pdf [file jama-e2218931-s002.pdf]

## Supplement 2

### PRISMA compliance

| Section and Topic       | Item # | Checklist item                                                                                                                                                                                                                                                                              | Location where reported                                                                                                                                               |
|-------------------------|--------|---------------------------------------------------------------------------------------------------------------------------------------------------------------------------------------------------------------------------------------------------------------------------------------------|-----------------------------------------------------------------------------------------------------------------------------------------------------------------------|
| <b>Title</b>            |        |                                                                                                                                                                                                                                                                                             |                                                                                                                                                                       |
| Title                   | 1      | Identify the report as a systematic review.                                                                                                                                                                                                                                                 | <i>The systematic review is a smaller component of the analysis presented in this paper in which a combined cohort analysis provides the mainstay of information.</i> |
| <b>Abstract</b>         |        |                                                                                                                                                                                                                                                                                             |                                                                                                                                                                       |
| Abstract                | 2      | See the PRISMA for Abstracts checklist.                                                                                                                                                                                                                                                     | Methods <i>Input Data</i><br><br>Table 2 <i>Published articles</i><br><br>eSection 4 <i>Data sources: Systematic literature review</i>                                |
| <b>Introduction</b>     |        |                                                                                                                                                                                                                                                                                             |                                                                                                                                                                       |
| Rationale               | 3      | Describe the rationale for the review in the context of existing knowledge.                                                                                                                                                                                                                 | Introduction paragraphs 1-3                                                                                                                                           |
| Objectives              | 4      | Provide an explicit statement of the objective(s) or question(s) the review addresses.                                                                                                                                                                                                      | Key Points: <i>Question</i>                                                                                                                                           |
| <b>Methods</b>          |        |                                                                                                                                                                                                                                                                                             |                                                                                                                                                                       |
| Eligibility criteria    | 5      | Specify the inclusion and exclusion criteria for the review and how studies were grouped for the syntheses                                                                                                                                                                                  | eSection 4 <i>Data sources: Systematic literature review</i><br><br>eFigure 8 <i>PRISMA diagram</i><br><br>Methods <i>Input data</i>                                  |
| Information sources     | 6      | Specify all databases, registers, websites, organisations, reference lists and other sources searched or consulted to identify studies. Specify the date when each source was last searched or consulted.                                                                                   | eSection 4 <i>Data sources: Information sources and search</i>                                                                                                        |
| Search strategy         | 7      | Present the full search strategies for all databases, registers and websites, including any filters and limits used.                                                                                                                                                                        | eSection 4 <i>Data sources: Information sources and search</i>                                                                                                        |
| Selection process       | 8      | Specify the methods used to decide whether a study met the inclusion criteria of the review, including how many reviewers screened each record and each report retrieved, whether they worked independently, and if applicable, details of automation tools used in the process.            | eSection 4 <i>Data sources: Study selection and data extraction</i>                                                                                                   |
| Data collection process | 9      | Specify the methods used to collect data from reports, including how many reviewers collected data from each report, whether they worked independently, any processes for obtaining or confirming data from study investigators, and if applicable, details of automation tools used in the | eSection 4 <i>Data sources</i>                                                                                                                                        |

|                               |            |                                                                                                                                                                                                                                                                               |                                                                                                                                                                                                                                                                                                      |
|-------------------------------|------------|-------------------------------------------------------------------------------------------------------------------------------------------------------------------------------------------------------------------------------------------------------------------------------|------------------------------------------------------------------------------------------------------------------------------------------------------------------------------------------------------------------------------------------------------------------------------------------------------|
|                               |            | process.                                                                                                                                                                                                                                                                      |                                                                                                                                                                                                                                                                                                      |
| Data items                    | <b>10a</b> | List and define all outcomes for which data were sought. Specify whether all results that were compatible with each outcome domain in each study were sought (e.g. for all measures, time points, analyses), and if not, the methods used to decide which results to collect. | eSection 4 <i>Data sources</i>                                                                                                                                                                                                                                                                       |
|                               | <b>10b</b> | List and define all other variables for which data were sought (e.g. participant and intervention characteristics, funding sources). Describe any assumptions made about any missing or unclear information.                                                                  | eSection 4 <i>Data sources: Study selection and data extraction</i>                                                                                                                                                                                                                                  |
| Study risk of bias assessment | <b>11</b>  | Specify the methods used to assess risk of bias in the included studies, including details of the tool(s) used, how many reviewers assessed each study and whether they worked independently, and if applicable, details of automation tools used in the process.             | Methods <i>Input data</i><br><br>eSection 4 <i>Data adjustments: Adjust for reporting individual symptoms</i>                                                                                                                                                                                        |
| Effect measures               | <b>12</b>  | Specify for each outcome the effect measure(s) (e.g. risk ratio, mean difference) used in the synthesis or presentation of results.                                                                                                                                           | Methods <i>Symptom cluster recovery patterns; Symptom cluster proportions</i> (synthesized with cohort and administrative data)                                                                                                                                                                      |
| Synthesis methods             | <b>13a</b> | Describe the processes used to decide which studies were eligible for each synthesis (e.g. tabulating the study intervention characteristics and comparing against the planned groups for each synthesis (item #5)).                                                          | (all models combined systematic literature review articles with cohort and administrative data)<br><br>Methods <i>Input data</i><br><br>eSection 4 <i>Duration estimates</i><br><br>eSection 4 <i>Prevalence estimates</i>                                                                           |
|                               | <b>13b</b> | Describe any methods required to prepare the data for presentation or synthesis, such as handling of missing summary statistics, or data conversions.                                                                                                                         | (each synthesis combined systematic literature review articles with cohort and administrative data)<br><br>Methods <i>Input data</i>                                                                                                                                                                 |
|                               | <b>13c</b> | Describe any methods used to tabulate or visually display results of individual studies and syntheses.                                                                                                                                                                        | Individual studies included in the analyses are summarized in Table 2 and data extractions from each study are shown in Supplementary Appendix Data Inputs                                                                                                                                           |
|                               | <b>13d</b> | Describe any methods used to synthesize results and provide a rationale for the choice(s). If meta-analysis was performed, describe the model(s), method(s) to identify the presence and extent of statistical heterogeneity, and software package(s) used.                   | (all models combined systematic literature review articles with cohort and administrative data)<br><br>Methods <i>Symptom cluster recovery patterns; Symptom cluster proportions</i>                                                                                                                 |
|                               | <b>13e</b> | Describe any methods used to explore possible causes of heterogeneity among study results (e.g. subgroup analysis, meta-regression).                                                                                                                                          | (all models combined systematic literature review articles with cohort and administrative data)<br><br>Methods <i>Symptom cluster recovery patterns; Symptom cluster proportions</i> . Used meta-regression methods including explicit quantification of between-study heterogeneity contributing to |

|                               |            |                                                                                                                                                                                                                                  |                                                                                                                                                                                                                                                                                                                                                                                                                                                                                                                      |
|-------------------------------|------------|----------------------------------------------------------------------------------------------------------------------------------------------------------------------------------------------------------------------------------|----------------------------------------------------------------------------------------------------------------------------------------------------------------------------------------------------------------------------------------------------------------------------------------------------------------------------------------------------------------------------------------------------------------------------------------------------------------------------------------------------------------------|
|                               |            |                                                                                                                                                                                                                                  | uncertainty intervals                                                                                                                                                                                                                                                                                                                                                                                                                                                                                                |
|                               | <b>13f</b> | Describe any sensitivity analyses conducted to assess robustness of the synthesized results.                                                                                                                                     | <i>n/a</i>                                                                                                                                                                                                                                                                                                                                                                                                                                                                                                           |
| Reporting bias assessment     | <b>14</b>  | Describe any methods used to assess risk of bias due to missing results in a synthesis (arising from reporting biases).                                                                                                          | <p>(all models combined systematic literature review articles with cohort and administrative data)</p> <p><i>We adjusted data by adding bias covariates into our metaregression. Trimming was used to make final estimates more robust.</i></p> <p>eSection 4 <i>Duration estimates</i></p> <p>eSection 4 <i>Prevalence estimates</i></p>                                                                                                                                                                            |
| Certainty assessment          | <b>15</b>  | Describe any methods used to assess certainty (or confidence) in the body of evidence for an outcome.                                                                                                                            | <p>(all models combined systematic literature review articles with cohort and administrative data)</p> <p><i>Our uncertainty intervals for all results incorporate uncertainty across all input data, model results, incidence and prevalence estimation, severity estimation, and disability weights. Trimming was used to make final estimates more robust.</i></p> <p>Methods <i>Incidence, prevalence, and severity-weighted prevalenceCOVID</i></p> <p>eSection 4 <i>Incidence and prevalence estimates</i></p> |
| <b>Results</b>                |            |                                                                                                                                                                                                                                  |                                                                                                                                                                                                                                                                                                                                                                                                                                                                                                                      |
| Study selection               | <b>16a</b> | Describe the results of the search and selection process, from the number of records identified in the search to the number of studies included in the review, ideally using a flow diagram.                                     | <p>eFigure 8 <i>PRISMA diagram</i></p> <p>Methods <i>Input data</i></p> <p>Table 2 <i>Published articles</i></p>                                                                                                                                                                                                                                                                                                                                                                                                     |
|                               | <b>16b</b> | Cite studies that might appear to meet the inclusion criteria, but which were excluded, and explain why they were excluded.                                                                                                      | <i>Studies were excluded because they did not meet the inclusion criteria; see PRISMA diagram.</i>                                                                                                                                                                                                                                                                                                                                                                                                                   |
| Study characteristics         | <b>17</b>  | Cite each included study and present its characteristics.                                                                                                                                                                        | eTable 2 <i>Published articles</i>                                                                                                                                                                                                                                                                                                                                                                                                                                                                                   |
| Risk of bias in studies       | <b>18</b>  | Present assessments of risk of bias for each included study.                                                                                                                                                                     | <p>Table 2</p> <p>eTable 2 <i>Published articles</i></p>                                                                                                                                                                                                                                                                                                                                                                                                                                                             |
| Results of individual studies | <b>19</b>  | For all outcomes, present, for each study: (a) summary statistics for each group (where appropriate) and (b) an effect estimate and its precision (e.g. confidence/credible interval), ideally using structured tables or plots. | <p>(all models combined systematic literature review articles with cohort and administrative data)</p> <p><i>Supplementary Appendix Data Inputs</i> provides extracted data with standard</p>                                                                                                                                                                                                                                                                                                                        |

|                       |            |                                                                                                                                                                                                                                                                                      |                                                                                                                                                                                                                                                              |
|-----------------------|------------|--------------------------------------------------------------------------------------------------------------------------------------------------------------------------------------------------------------------------------------------------------------------------------------|--------------------------------------------------------------------------------------------------------------------------------------------------------------------------------------------------------------------------------------------------------------|
|                       |            |                                                                                                                                                                                                                                                                                      | errors                                                                                                                                                                                                                                                       |
| Results of syntheses  | <b>20a</b> | For each synthesis, briefly summarise the characteristics and risk of bias among contributing studies.                                                                                                                                                                               | (all models combined systematic literature review articles with cohort and administrative data)<br><br><i>Methods Proportions and duration of symptom clusters</i><br><br>eSection 4 <i>Duration estimates</i><br><br>eSection 4 <i>Prevalence estimates</i> |
|                       | <b>20b</b> | Present results of all statistical syntheses conducted. If meta-analysis was done, present for each the summary estimate and its precision (e.g. confidence/credible interval) and measures of statistical heterogeneity. If comparing groups, describe the direction of the effect. | (all models combined systematic literature review articles with cohort and administrative data)<br><br>Table 3<br><br>eTable 14-17                                                                                                                           |
|                       | <b>20c</b> | Present results of all investigations of possible causes of heterogeneity among study results.                                                                                                                                                                                       | (all models combined systematic literature review articles with cohort and administrative data)<br><br>eTables 5-13<br><br>metaregression methods explicitly quantify between-study heterogeneity and incorporate this into uncertainty intervals            |
|                       | <b>20d</b> | Present results of all sensitivity analyses conducted to assess the robustness of the synthesized results.                                                                                                                                                                           | eSection 4 <i>Sensitivity analysis of recovery pattern prior</i>                                                                                                                                                                                             |
| Reporting biases      | <b>21</b>  | Present assessments of risk of bias due to missing results (arising from reporting biases) for each synthesis assessed.                                                                                                                                                              | n/a                                                                                                                                                                                                                                                          |
| Certainty of evidence | <b>22</b>  | Present assessments of certainty (or confidence) in the body of evidence for each outcome assessed.                                                                                                                                                                                  | (all models combined systematic literature review articles with cohort and administrative data)<br><br><i>Uncertainty intervals are included in all in-text and table results.</i>                                                                           |
| <b>Discussion</b>     |            |                                                                                                                                                                                                                                                                                      |                                                                                                                                                                                                                                                              |
| Discussion            | <b>23a</b> | Provide a general interpretation of the results in the context of other evidence.                                                                                                                                                                                                    | Discussion paragraphs 1-7                                                                                                                                                                                                                                    |
|                       | <b>23b</b> | Discuss any limitations of the evidence included in the review.                                                                                                                                                                                                                      | Discussion paragraph 8                                                                                                                                                                                                                                       |
|                       | <b>23c</b> | Discuss any limitations of the review processes used.                                                                                                                                                                                                                                | <i>Methods Input data</i><br><br><i>Discussion Limitations</i>                                                                                                                                                                                               |
|                       | <b>23d</b> | Discuss implications of the results for practice, policy, and future research.                                                                                                                                                                                                       | Discussion paragraphs 5-6                                                                                                                                                                                                                                    |

| Other information                              |            |                                                                                                                                                                                                                                            |                                                                                                                                                                                                                                            |
|------------------------------------------------|------------|--------------------------------------------------------------------------------------------------------------------------------------------------------------------------------------------------------------------------------------------|--------------------------------------------------------------------------------------------------------------------------------------------------------------------------------------------------------------------------------------------|
| Registration and protocol                      | <b>24a</b> | Provide registration information for the review, including register name and registration number, or state that the review was not registered.                                                                                             | Methods <i>Input data</i><br><br>Reference #23 in manuscript and #24 in Appendix<br><br>eSection 5 <i>Data sources: Systematic literature review</i>                                                                                       |
|                                                | <b>24b</b> | Indicate where the review protocol can be accessed, or state that a protocol was not prepared.                                                                                                                                             | <i>URL to registered review protocol is included in reference to Mao et al</i>                                                                                                                                                             |
|                                                | <b>24c</b> | Describe and explain any amendments to information provided at registration or in the protocol.                                                                                                                                            | eSection 4 <i>Data sources: Systematic literature review</i>                                                                                                                                                                               |
| Support                                        | <b>25</b>  | Describe sources of financial or non-financial support for the review, and the role of the funders or sponsors in the review.                                                                                                              | Acknowledgments                                                                                                                                                                                                                            |
| Competing interests                            | <b>26</b>  | Declare any competing interests of review authors.                                                                                                                                                                                         | Acknowledgments                                                                                                                                                                                                                            |
| Availability of data, code and other materials | <b>27</b>  | Report which of the following are publicly available and where they can be found: template data collection forms; data extracted from included studies; data used for all analyses; analytic code; any other materials used in the review. | Data and code used for analyses are available in the upcoming GBD input data tool. Code is also available upon request to <a href="mailto:swulf@uw.edu">swulf@uw.edu</a> . Input data are available as Supplementary Appendix Data Inputs. |

4

5 *From:* Page MJ, McKenzie JE, Bossuyt PM, Boutron I, Hoffmann TC, Mulrow CD, et al. The PRISMA 2020  
6 statement: an updated guideline for reporting systematic reviews. BMJ 2021;372:n71. doi: 10.1136/bmj.n71. For  
7 more information, visit: <http://www.prisma-statement.org/>
