# Supplementary material
Source: PubMed Central journal article supplement (PMC9552043)
Supplement: jama-e2218931-s004.pdf [file jama-e2218931-s004.pdf]

## Supplement 4

### GATHER compliance

This analysis complied with the Guidelines for Accurate and Transparent Health Estimates Reporting (GATHER).<sup>1</sup> We have documented the steps in our analytical procedures and detailed the data sources used. The GATHER recommendations can be found on the [GATHER website](#).

| Item #                                                                                      | Checklist item                                                                                                                                                                                                                                                                                                                                | Reported on page #                                                                                                                                                                                                                                                                                                                               |
|---------------------------------------------------------------------------------------------|-----------------------------------------------------------------------------------------------------------------------------------------------------------------------------------------------------------------------------------------------------------------------------------------------------------------------------------------------|--------------------------------------------------------------------------------------------------------------------------------------------------------------------------------------------------------------------------------------------------------------------------------------------------------------------------------------------------|
| <b>Objectives and funding</b>                                                               |                                                                                                                                                                                                                                                                                                                                               |                                                                                                                                                                                                                                                                                                                                                  |
| 1                                                                                           | Define the indicator(s), populations (including age, sex, and geographic entities), and time period(s) for which estimates were made.                                                                                                                                                                                                         | Key Points<br><br>Abstract Design<br><br>Introduction paragraph 4<br><br>Methods                                                                                                                                                                                                                                                                 |
| 2                                                                                           | List the funding sources for the work.                                                                                                                                                                                                                                                                                                        | <i>All funding sources are listed in the Acknowledgments</i>                                                                                                                                                                                                                                                                                     |
| <b>Data Inputs</b>                                                                          |                                                                                                                                                                                                                                                                                                                                               |                                                                                                                                                                                                                                                                                                                                                  |
| <i>For all data inputs from multiple sources that are synthesized as part of the study:</i> |                                                                                                                                                                                                                                                                                                                                               |                                                                                                                                                                                                                                                                                                                                                  |
| 3                                                                                           | Describe how the data were identified and how the data were accessed.                                                                                                                                                                                                                                                                         | Methods <i>Input data</i><br><br>eSection 3 <i>Asymptomatic cases: Data</i><br><br>eSection 3 <i>Non-hospitalized cases: Proportion of deaths in long-term care</i><br><br>eSection 3 <i>Hospitalized cases: Proportion deaths among hospitalized and ICU cases</i><br><br>eSection 4 <i>Data sources</i>                                        |
| 4                                                                                           | Specify the inclusion and exclusion criteria. Identify all ad-hoc exclusions.                                                                                                                                                                                                                                                                 | Methods <i>Input data</i><br><br>eSection 3 <i>Asymptomatic cases: Data</i><br><br>eSection 3 <i>Non-hospitalized cases: Proportion of deaths in long-term care</i><br><br>eSection 3 <i>Hospitalized cases: Proportion deaths among hospitalized and ICU cases</i><br><br>eSection 4 <i>Data sources</i><br><br>eFigure 8 <i>PRISMA diagram</i> |
| 5                                                                                           | Provide information on all included data sources and their main characteristics. For each data source used, report reference information or contact name/institution, population represented, data collection method, year(s) of data collection, sex and age range, diagnostic criteria or measurement method, and sample size, as relevant. | Table 2, eTable 2<br><br>eSection 4                                                                                                                                                                                                                                                                                                              |

|                                                                                                       |                                                                                                                                                                                                                                                                                                                                                                                           |                                                                                                                                                                                                                                                                                                                                                                                                                                                                       |
|-------------------------------------------------------------------------------------------------------|-------------------------------------------------------------------------------------------------------------------------------------------------------------------------------------------------------------------------------------------------------------------------------------------------------------------------------------------------------------------------------------------|-----------------------------------------------------------------------------------------------------------------------------------------------------------------------------------------------------------------------------------------------------------------------------------------------------------------------------------------------------------------------------------------------------------------------------------------------------------------------|
|                                                                                                       |                                                                                                                                                                                                                                                                                                                                                                                           | Supplementary Appendix Data Inputs                                                                                                                                                                                                                                                                                                                                                                                                                                    |
| 6                                                                                                     | Identify and describe any categories of input data that have potentially important biases (e.g., based on characteristics listed in item 5).                                                                                                                                                                                                                                              | Table 2<br><br>Discussion <i>Limitations</i><br><br>eSection 4 <i>Data sources</i>                                                                                                                                                                                                                                                                                                                                                                                    |
| <b>For data inputs that contribute to the analysis but were not synthesized as part of the study:</b> |                                                                                                                                                                                                                                                                                                                                                                                           |                                                                                                                                                                                                                                                                                                                                                                                                                                                                       |
| 7                                                                                                     | Describe and give sources for any other data inputs.                                                                                                                                                                                                                                                                                                                                      | Table 1 <i>Disability weights</i><br><br>eSection 4 <i>Severity-weighted prevalence</i>                                                                                                                                                                                                                                                                                                                                                                               |
| <b>For all data inputs:</b>                                                                           |                                                                                                                                                                                                                                                                                                                                                                                           |                                                                                                                                                                                                                                                                                                                                                                                                                                                                       |
| 8                                                                                                     | Provide all data inputs in a file format from which data can be efficiently extracted (e.g., a spreadsheet rather than a PDF), including all relevant meta-data listed in item 5. For any data inputs that cannot be shared because of ethical or legal reasons, such as third-party ownership, provide a contact name or the name of the institution that retains the right to the data. | <i>All input data are available in Supplementary Appendix Data Inputs</i>                                                                                                                                                                                                                                                                                                                                                                                             |
| <b>Data analysis</b>                                                                                  |                                                                                                                                                                                                                                                                                                                                                                                           |                                                                                                                                                                                                                                                                                                                                                                                                                                                                       |
| 9                                                                                                     | Provide a conceptual overview of the data analysis method. A diagram may be helpful.                                                                                                                                                                                                                                                                                                      | Figure 1 <i>conceptual framework of long COVID analysis</i><br><br>eFigure 1<br><br>eFigure 2<br><br>eFigure 7                                                                                                                                                                                                                                                                                                                                                        |
| 10                                                                                                    | Provide a detailed description of all steps of the analysis, including mathematical formulae. This description should cover, as relevant, data cleaning, data pre-processing, data adjustments and weighting of data sources, and mathematical or statistical model(s).                                                                                                                   | <u>Data cleaning, pre-processing, and adjustments:</u><br><br>Methods<br><br>eSection 3 <i>Data</i> subheadings<br><br>eSection 4 <i>Data sources, Data adjustments</i><br><br><u>Models:</u><br><br>Methods<br><br>eSection 3 <i>Methods</i> subheadings<br><br>eSection 4 <i>Duration estimates</i><br><br>eSection 4 <i>Prevalence estimates</i><br><br>eSection 4 <i>Incidence and prevalence estimates</i><br><br>eSection 4 <i>Severity-weighted prevalence</i> |

|                               |                                                                                                                                                                  |                                                                                                                                                                                                                    |
|-------------------------------|------------------------------------------------------------------------------------------------------------------------------------------------------------------|--------------------------------------------------------------------------------------------------------------------------------------------------------------------------------------------------------------------|
| 11                            | Describe how candidate models were evaluated and how the final model(s) were selected.                                                                           | <i>Models were pre-specified with covariates and informative priors.</i>                                                                                                                                           |
| 12                            | Provide the results of an evaluation of model performance, if done, as well as the results of any relevant sensitivity analysis.                                 | eSection 4 <i>Sensitivity analysis of recovery pattern prior</i>                                                                                                                                                   |
| 13                            | Describe methods for calculating uncertainty of the estimates. State which sources of uncertainty were, and were not, accounted for in the uncertainty analysis. | Methods <i>Incidence, prevalence, and severity-weighted prevalence</i><br><br>eSection 4 <i>Duration estimates</i><br><br>eSection 4 <i>Incidence and prevalence estimates</i>                                     |
| 14                            | State how analytic or statistical source code used to generate estimates can be accessed.                                                                        | Data and code used for analyses are available in the upcoming GBD input data tool. Code is also available upon request to <a href="mailto:swulf@uw.edu">swulf@uw.edu</a> . Input data are available as Appendix 2. |
| <b>Results and Discussion</b> |                                                                                                                                                                  |                                                                                                                                                                                                                    |
| 15                            | Provide published estimates in a file format from which data can be efficiently extracted.                                                                       | <i>Will be provided upon publication</i>                                                                                                                                                                           |
| 16                            | Report a quantitative measure of the uncertainty of the estimates (e.g. uncertainty intervals).                                                                  | <i>Tables and in-text estimates include uncertainty intervals.</i>                                                                                                                                                 |
| 17                            | Interpret results in light of existing evidence. If updating a previous set of estimates, describe the reasons for changes in estimates.                         | Discussion paragraphs 1-7                                                                                                                                                                                          |
| 18                            | Discuss limitations of the estimates. Include a discussion of any modelling assumptions or data limitations that affect interpretation of the estimates.         | Discussion <i>Limitations</i>                                                                                                                                                                                      |

6

- 7 1. Stevens GA, Alkema L, Black RE, et al. Guidelines for Accurate and Transparent Health Estimates  
8 Reporting: the GATHER statement. *PLOS Med.* 2016;13(6):e1002056.  
9 doi:10.1371/journal.pmed.1002056

10
